# Supplementary material
Source: PubMed Central journal article supplement (PMC4644635)
Supplement: NIHMS733757-supplement-supplement_1.pdf [file NIHMS733757-supplement-supplement_1.pdf]

## Supplemental materials

Figure S1. GLI2 is expressed in FLT3-ITD AML clinical specimens.

Figure S2. Flt3/ITD-SmoM2 transgenic mice express Hh pathway genes and develop clinically relevant AML.

Figure S3. Specific bone marrow hematopoietic stem cell and myeloid progenitor compartments are maintained in Flt3/ITD-SmoM2 mice.

Figure S4. Leukemia formation in Flt3/ITD-SmoM2 mice is cell intrinsic.

Figure S5. GSEA reveals increased STAT5 signaling in Flt3/ITD and anti-apoptotic features in Flt3/ITD-SmoM2 mice.

Figure S6. The combination of sorafenib and IPI-926 limit the growth of *FLT3*-ITD AML.

Figure S7. Hh signaling impacts FLT3-ITD at the level of STAT5.

Figure S8. IPI-926 inhibits the expression of Hh target genes in Flt3/ITD-SmoM2 bone marrow cells.

Table S1. Leukemic organ infiltration.

Table S2. Primer sequences.

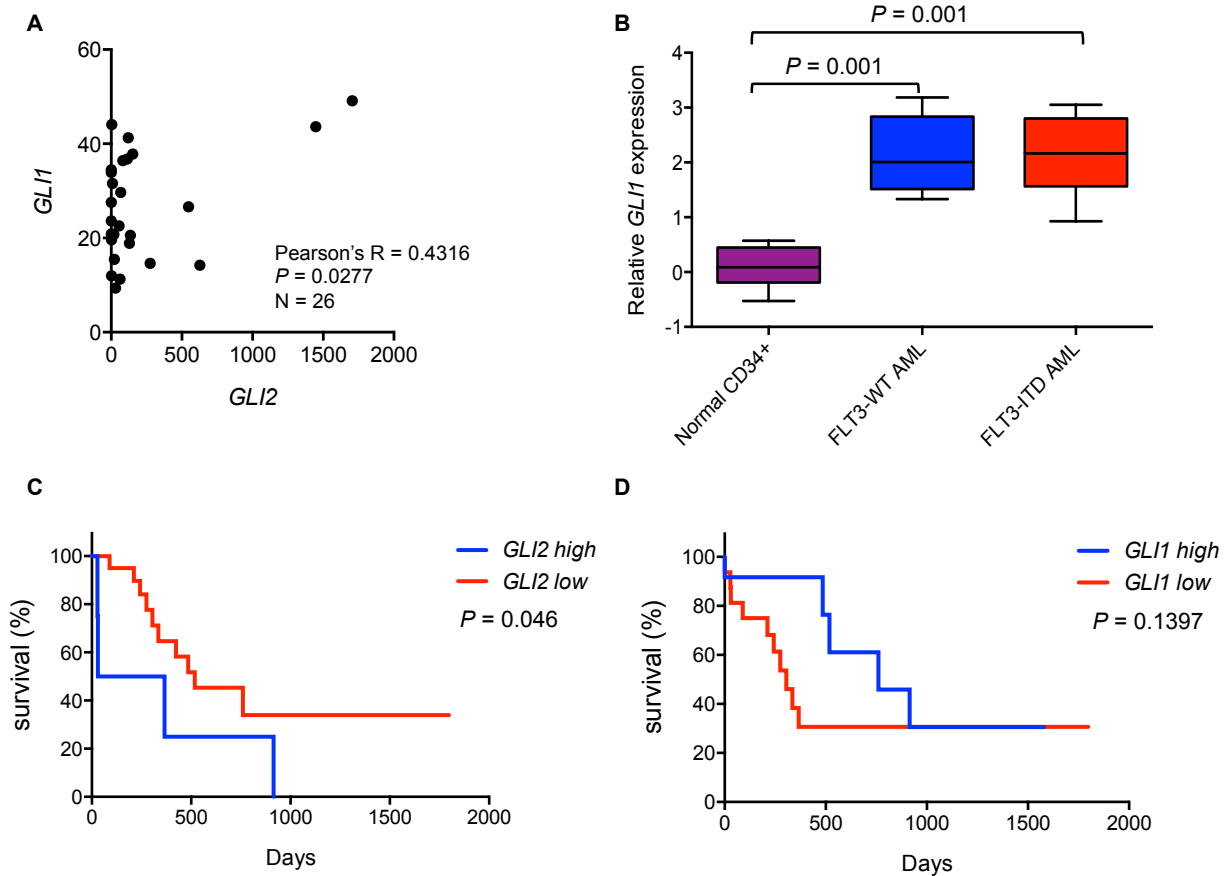

**Figure S1. GLI2 is expressed in FLT3-ITD AML clinical specimens.** (A) Correlation of *GLI1* and *GLI2* expression in *FLT3*-ITD AML patients from TCGA AML dataset. (B) *GLI1* gene expression in AML patient samples relative to normal human CD34+ cells. (C) Survival of patients with *FLT3*-ITD AML grouped by *GLI2* expression. Patients with *FLT3*-ITD were stratified on the basis of *GLI2* expression as high (above average) and low (below average) groups [average=204, expression determined by RNAseq (RSEM)]. *GLI2* mRNA expression data and *FLT3* mutation status were obtained from cBioPortal ([www.cbioportal.org](http://www.cbioportal.org)), and clinical data including survival were obtained from TCGA ([cancergenome.nih.gov](http://cancergenome.nih.gov)). *P* value was determined with the Gehan-Breslow-Wilcoxon test. (D) Survival of patients with *FLT3*-ITD AML grouped by *GLI1* expression.

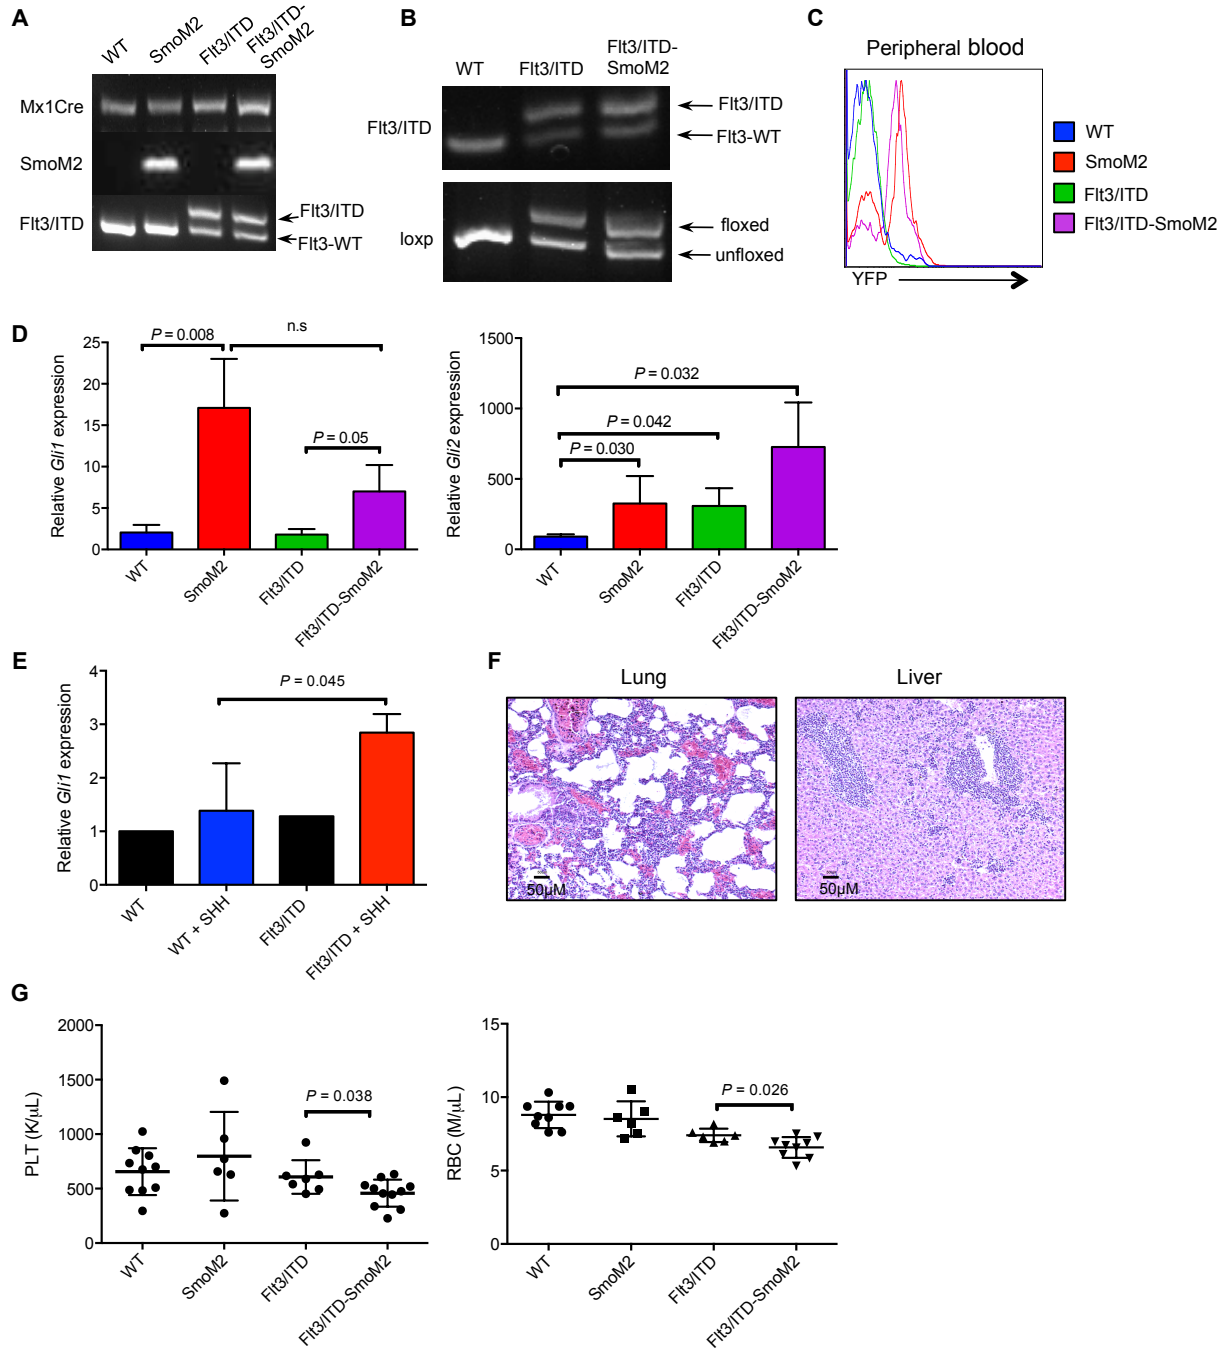

**Figure S2. *Flt3/ITD-SmoM2* transgenic mice express Hh pathway genes and develop clinically relevant AML. (A)** Genotyping of *Flt3/ITD-SmoM2* transgenic animals. Each lane represents a mouse genotype and each band the detected allele. **(B)** PCR showing excision of *Flt3-ITD* after poly(I:C) administration. **(C)** Peripheral blood flow cytometry of YFP expression after poly(I:C) administration. **(D)** *Gli1* and *Gli2* expression in mouse whole bone marrow cells (n=3). Data represent mean  $\pm$  SD. **(E)** *Gli1* expression in mouse bone marrow after SHH treatment (n=3). Data represent mean  $\pm$  SD. **(F)** Hematoxylin and eosin stained sections of lung and liver. Bars represent 50  $\mu$ M. **(G)** Peripheral red blood cell and platelet counts. Each data point represents one mouse.

**A**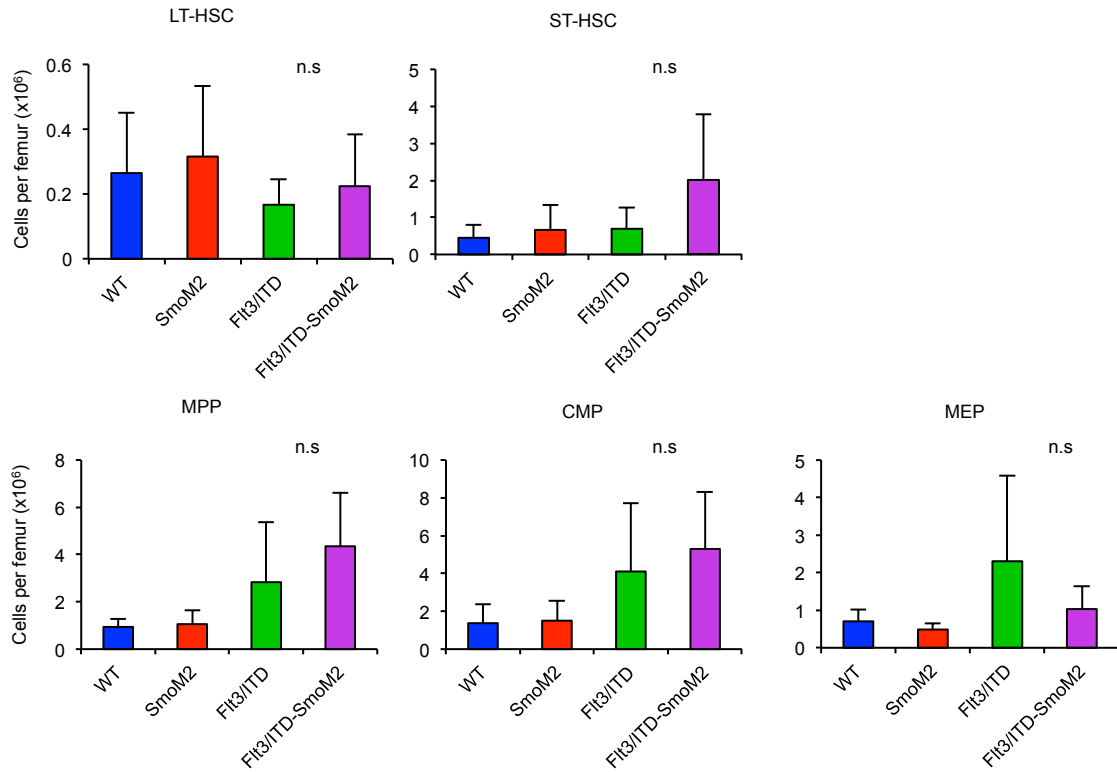**B**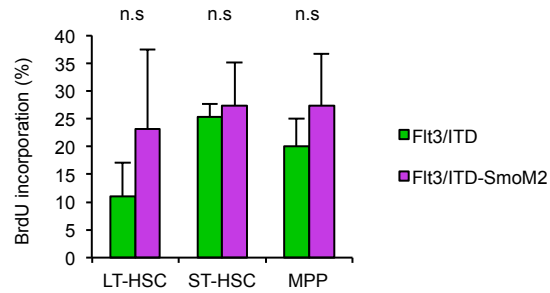

**Figure S3. Specific bone marrow hematopoietic stem cell and myeloid progenitor compartments are maintained in Flt3/ITD-SmoM2 mice.** (A) Total number of immature HSPCs (n=3). Data represent mean  $\pm$  SD. n.s.=non-significant. (B) BrdU incorporation by primitive HSPC populations (n=3). Data represent mean  $\pm$  SD. n.s.=non-significant.

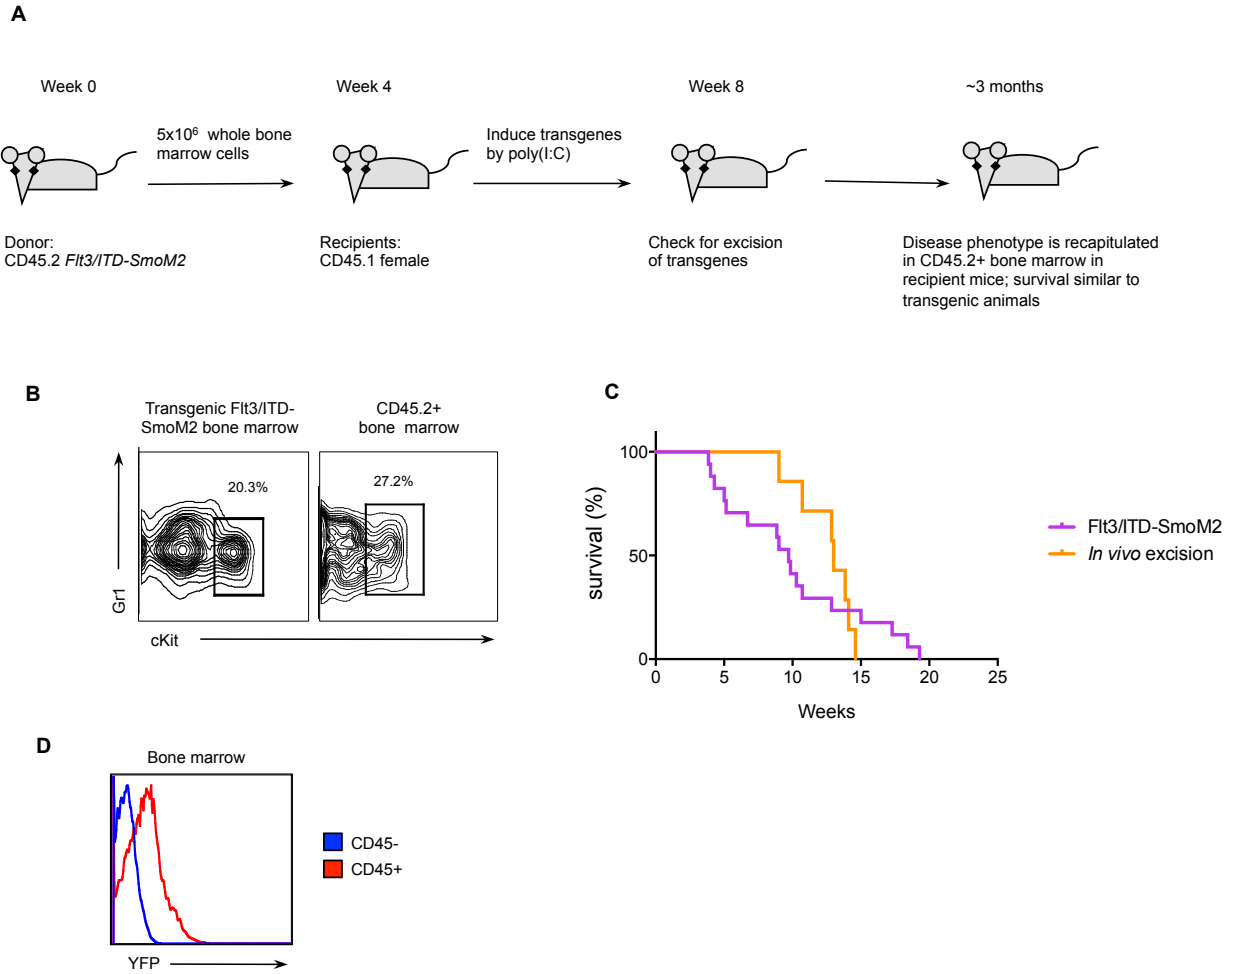

**Figure S4. Leukemia formation in *FIt3/ITD-SmoM2* mice is cell-intrinsic.** (A) Experimental schema. (B) Recapitulation of disease phenotype in bone marrow of original transgenic animals (left) and transplanted CD45.1 recipients (right). (C) Kaplan Meier survival curve of recipient mice after poly(I:C) administration compared to transgenic *FIt3/ITD-SmoM2* mice. (D) YFP expression in bone marrow of transplanted mice.

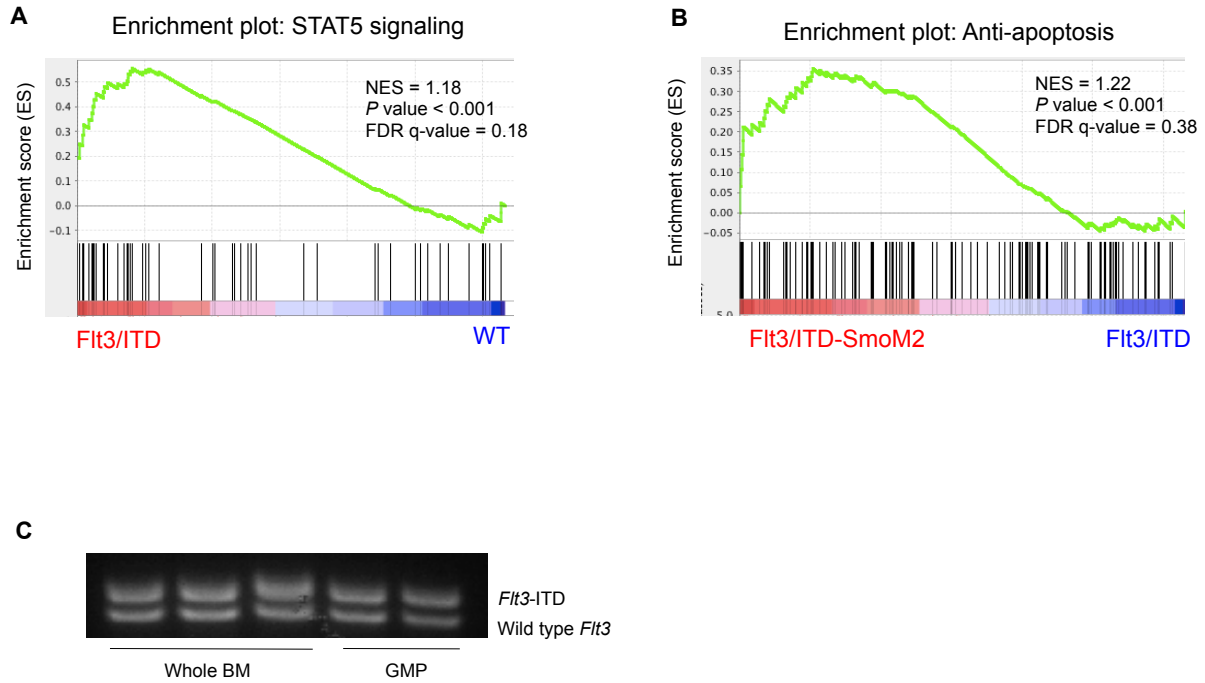

**Figure S5. GSEA reveals increased STAT5 signaling in *Flt3/ITD* and anti-apoptotic features in *Flt3/ITD-SmoM2* mice.** (A) GSEA analysis comparing *Flt3/ITD* and wild type mice using gene sets representing STAT5 signaling. (B) GSEA analysis comparing *Flt3/ITD-SmoM2* and *Flt3/ITD* mice with gene sets representing anti-apoptosis. (C) PCR analysis of *Flt3/ITD* status in whole bone marrow and GMP cells of *Flt3/ITD-SmoM2* diseased mice. Each lane represents an individual *Flt3/ITD-SmoM2* mouse.

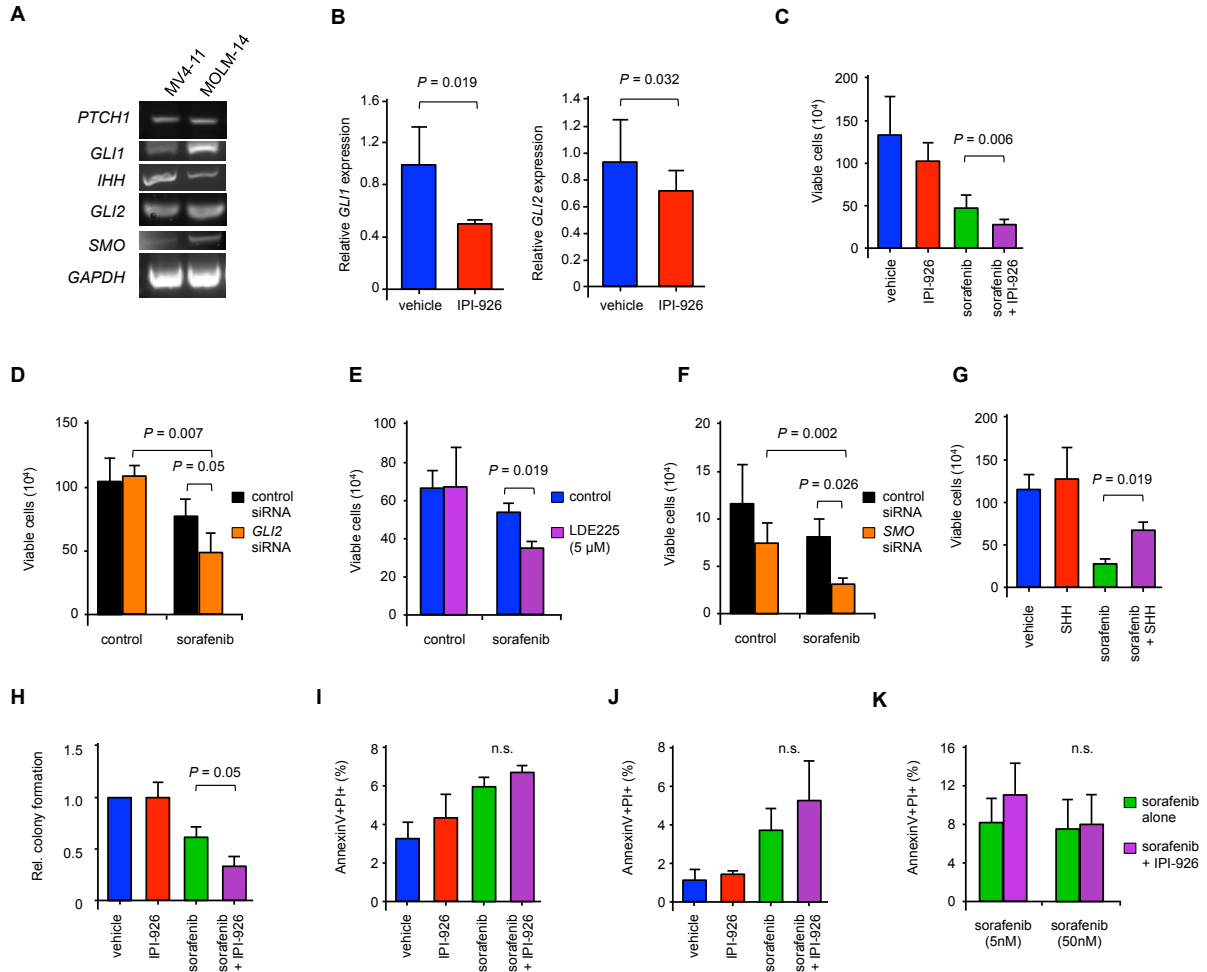

**Figure S6. The combination of sorafenib and IPI-926 limit the growth of *FLT3*-ITD AML.** (A) Expression of Hh components in AML cell lines. (B) Relative *GLI1* and *GLI2* expression in MV4-11 cells treated with IPI-926 (n=3). Data represent mean  $\pm$  SD. (C) Viable cell counts in drug-treated Molm-14 cells. (D) Viable cell counts after transfection of MV4-11 cells with *GLI2* or control siRNA and treated with sorafenib 24 hours later (n=3). Data represent mean  $\pm$  SD. (E) Viable cell counts of MV4-11 cells treated with LDE225 and/or sorafenib (n=3). Data represent mean  $\pm$  SD. (F) Viable cell counts of MV4-11 cells after transfection of *SMO* or control siRNA followed 24 hours later with sorafenib (n=3). Data represent mean  $\pm$  SD. (G) Viable cell counts of MOLM-14 cells treated with SHH and sorafenib (n=3). Data represent mean  $\pm$  SD. (H) Relative colony formation of Molm-14 cells after drug treatment (n=3). Data represent mean  $\pm$  SD. Apoptosis of drug-treated (I) MV4-11, (J) Molm-14 cells, and (K) HL60 cells (n=3). Data represent mean  $\pm$  SD. n.s.=non-significant.

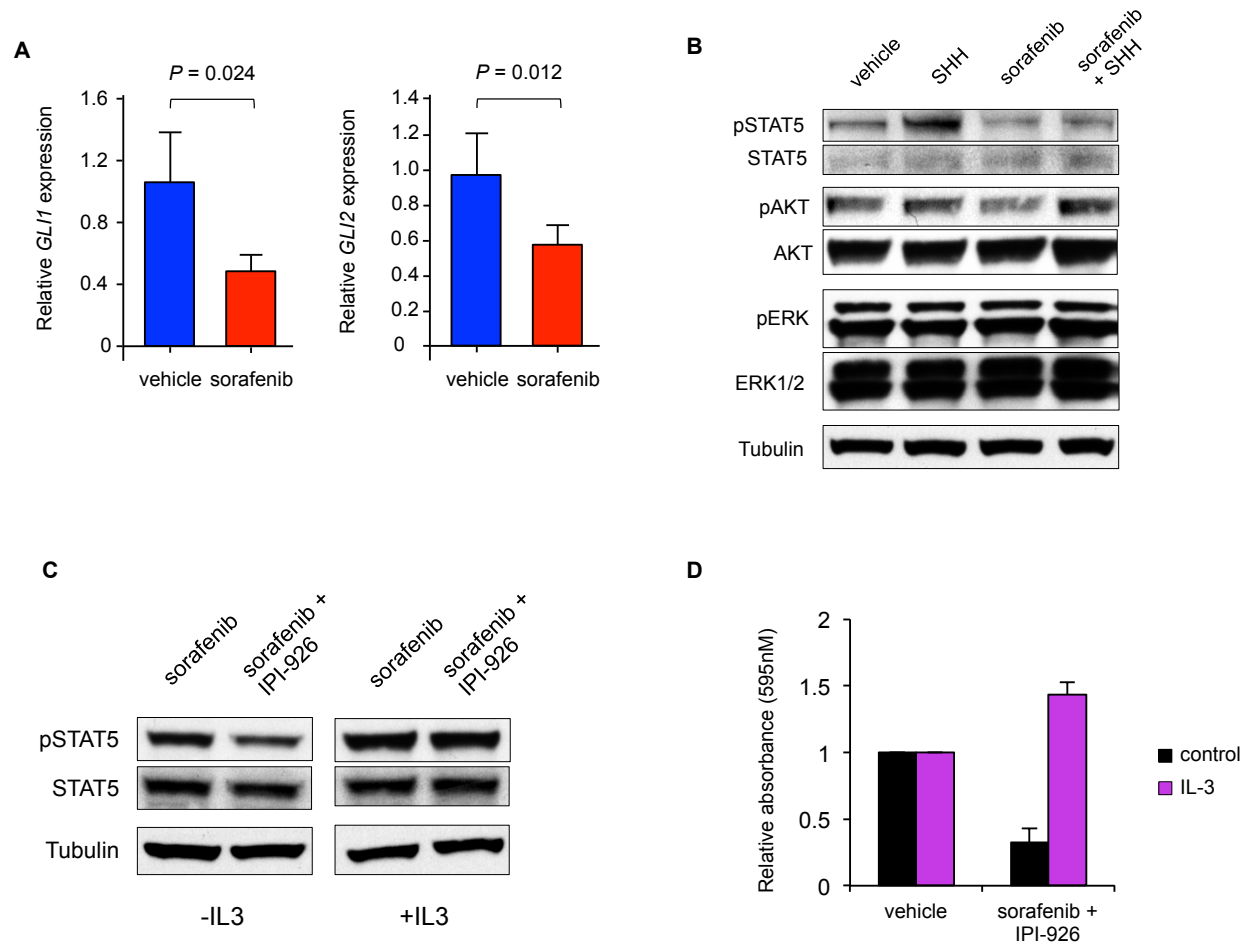

**Figure S7. Hh signaling impacts FLT3-ITD at the level of STAT5.** (A) Relative *GLI1* and *GLI2* expression in MV4-11 cells after sorafenib treatment (n=3). Data represent mean  $\pm$  SD. (B) Western blot showing protein expression in MV4-11 cells after SHH and/or sorafenib treatment. (C) Western blot of pSTAT5 and STAT5 expression in Baf3/ITD cells after drug and IL-3 treatment. (D) MTT assay of Baf3/ITD cells after treatment with sorafenib + IPI-926 with or without IL-3 (n=3). Data represent mean  $\pm$  SD.



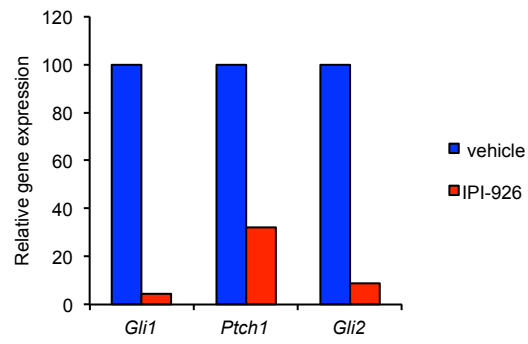

**Figure S8. IPI-926 inhibits the expression of Hh target genes in Flt3/ITD-SmoM2 bone marrow cells.**

| Genotype              | Spleen | Bone Marrow | Liver  | Lung   | Kidney | Thymus   |
|-----------------------|--------|-------------|--------|--------|--------|----------|
| <i>Flt3/ITD-SmoM2</i> | 3+     | 3+          | normal | normal | 1+     | depleted |
| <i>Flt3/ITD-SmoM2</i> | 3+     | 3+          | 3+     | 3+     | 1+     | depleted |
| <i>Flt3/ITD-SmoM2</i> | 3+     | 3+          | 1+     | 2+     | normal | depleted |
| <i>Flt3/ITD-SmoM2</i> | 3+     | 3+          | 2+     | normal | normal | depleted |
| <i>Flt3/ITD</i>       | 1+     | 1+          | 1+     | normal | normal | normal   |
| <i>SmoM2</i>          | normal | normal      | normal | normal | normal | normal   |
| <i>SmoM2</i>          | normal | normal      | normal | normal | normal | normal   |
| WT                    | normal | normal      | normal | normal | normal | normal   |

**Table S1. Leukemic organ infiltration.**

Normal = similar to wild type

Depleted = decreased tissue cellularity compared to wild type

1+ = low degree of infiltration of tissue with undifferentiated myeloid cells

2+ = intermediate degree of infiltration of tissue with undifferentiated myeloid cells

3+ = high degree of infiltration of tissue with undifferentiated myeloid cells

**Table S2. PCR primers**

|                     | Forward primer sequence (5' to 3') | Reverse primer sequence (5' to 3') |
|---------------------|------------------------------------|------------------------------------|
| Mouse genotyping    |                                    |                                    |
| <i>SmoM2</i>        | AAGTTCATCTGCACCACCG                | TCCTTGAAGAAGAT GTGCG               |
| <i>Flt3-ITD</i>     | CTCTC GGAACTCCCCTTA                | TGCAGATGATCCAGGTGACT               |
| <i>Mx1Cre</i>       | GCGGTCTGGCAGTAAAACTA TC            | GTGAAACAGCATTGCTGTCACTT            |
| <i>loxP</i>         | CTTCGTATAATGTATGCTATACG            | TCGTATAGCATACATTATACG              |
| Mouse qRT-PCR       |                                    |                                    |
| <i>Socs3</i>        | CCAAGAACCTACGCATCCAGTG             | CGTGGGTGGCAAAGAAAAGG               |
| <i>Fos</i>          | CGAAGGGAACGGAATAAGATGG             | AGACCTCCAGTCAAATCCAGGG             |
| <i>JunB</i>         | CAGCTACTTTTCGGGTCAGGG              | GGCTAGCTTCAGAGATGCGC               |
| <i>p57</i>          | CAGCGGACGATGGAAGAACT               | CTCCGGTTCCTGCTACATGAA              |
| <i>CyclinF</i>      | GCCTCTCGCTTCTTCAGCAT               | GGCGGATGAAGAGCCAGAT                |
| <i>Pim1</i>         | GCCCTCCTTTGAAGAAATCC               | GGACCTGGAGTCTGGAATGA               |
| <i>RPS16</i>        | CTTGAGGCTTCATCCACAT                | ATATTCGGGTCCGTGTGAAG               |
| <i>Mkp1</i>         | GTGCCTATCACGCTTCTCGG               | TGGTTGTCCTCCACAGGGAT               |
| Human qRT-PCR       |                                    |                                    |
| <i>PTCH1</i>        | AATAAGGCTGAGGTTGGTCATGGTTAC        | AGGGTCGTGGTGGTGAAGGAAAG            |
| <i>IHH</i>          | GGCAGCTGTCTCTACACACG               | GGGCCTAAGATGGATGGAAT               |
| <i>GLI1</i>         | CCACGGGGAGCGGAAGGAG                | ACTGGCATTGCTGAAGGCTTTACTG          |
| <i>SMO</i>          | GGTGTGGTTTGGTTTGTGGTCCTC           | CCTGGTTGAAGAAGTCGTAGAAGTGG         |
| <i>BETA</i>         |                                    |                                    |
| <i>ACTIN</i>        | ATCCACGAAACTACCTTCAACTCCAT         | CATACTCCTGCTTGCTGATCCACATC         |
| Taqman probes (ABI) |                                    |                                    |
| Species             | Gene                               | Probe I.D.                         |
| Human               | <i>GLI1</i>                        | Hs01110766_m1                      |
| Human               | <i>PTCH1</i>                       | Hs00181117_m1                      |
| Human               | <i>GLI2</i>                        | Hs01119974_m1                      |
| Mouse               | <i>Gli1</i>                        | Mm00494645_m1                      |
| Mouse               | <i>Rps18</i>                       | Mm02601777_g1                      |
